# Supplementary material
Source: Royal Society of Chemistry journal article supplement (doi:10.1039/d6tb00557h)
Supplement: d6tb00557h1.pdf [file d6tb00557h1.pdf]

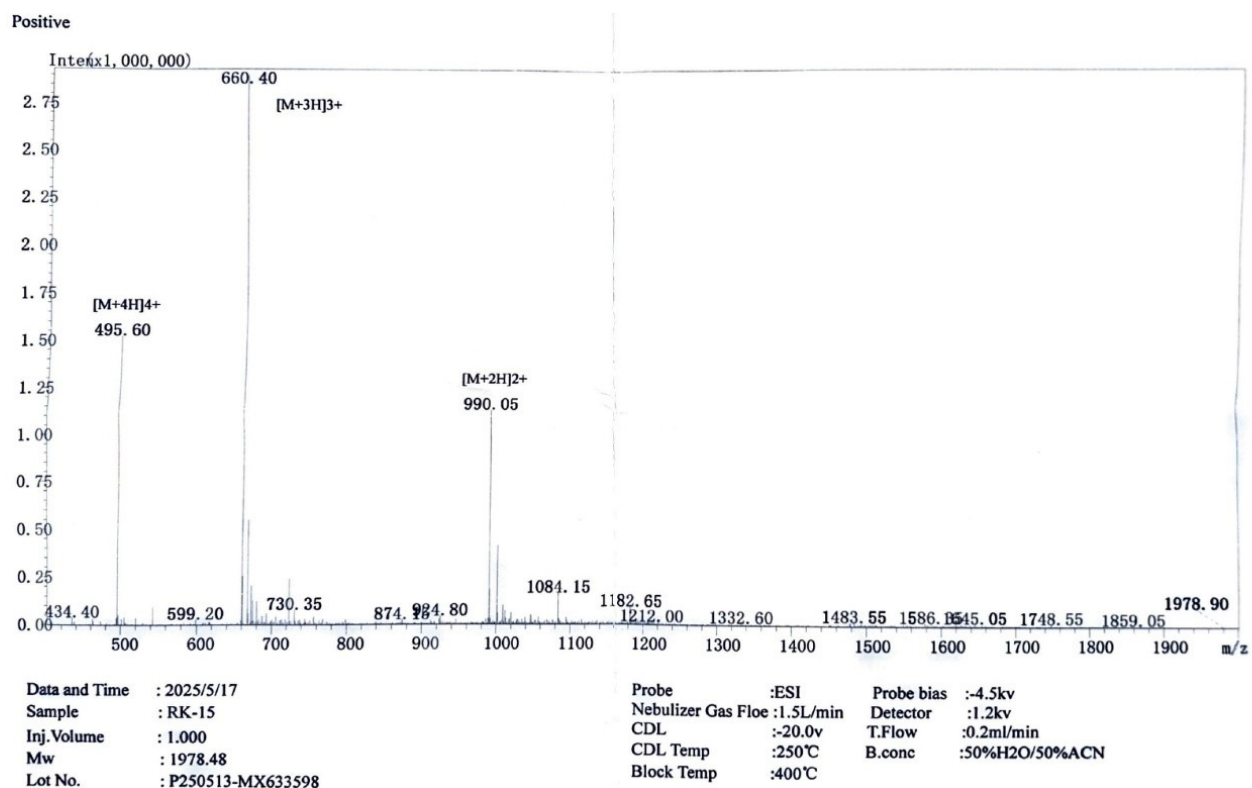

**Figure S1:** Electrospray ionization mass spectrum of synthetic peptide ‘DP1’. The observed molecular ion peaks at  $m/z$  990.05 and 660.40 correspond to the doubly charged  $[M+2H]^{2+}$  and triply charged  $[M+3H]^{3+}$  species, respectively, confirming the expected molecular weight (1978.48 Da) and successful peptide synthesis with correct molecular integrity.



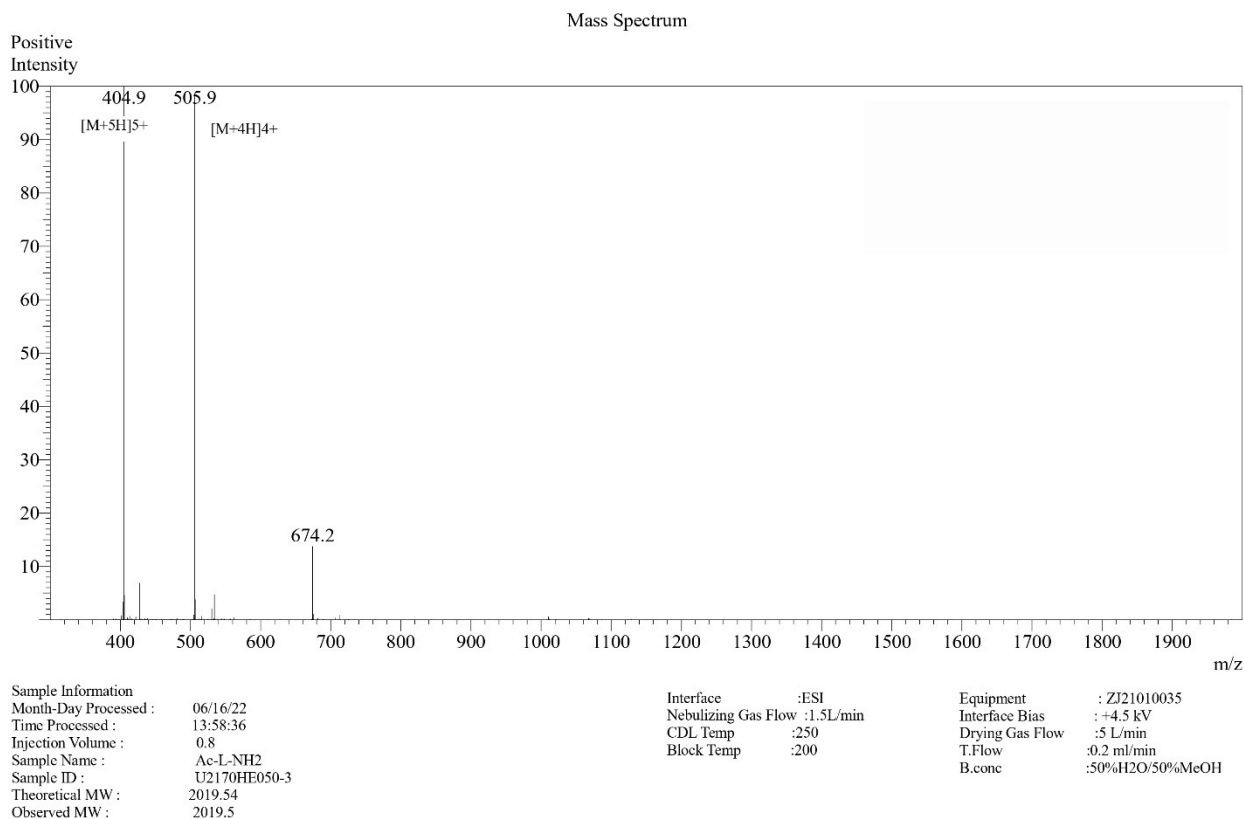

**Figure S3:** Electrospray ionization mass spectrum of N-terminal acetylated and C-terminal amidated peptide ‘b-DP1’. The spectrum exhibits multiple charge states, including peaks corresponding to  $[M+2H]^{2+}$  and  $[M+3H]^{3+}$  species, characteristic of ESI ionization of peptides. The observed molecular weight (2019.5 Da) closely matches the theoretical value (2019.54 Da), confirming successful incorporation of N-terminal acetylation and C-terminal amidation and validating the molecular integrity of the modified peptide.

Sample Name : Ac-L-NH2  
 Sample ID : U2170HE050-3  
 Time Processed : 6:35:28  
 Month-Day-Year Processed : 06/16/2022

Pump A : 0.065% trifluoroacetic in 100% water (v/v)  
 Pump B : 0.05% trifluoroacetic in 100% acetonitrile (v/v)  
 Total Flow: 1 ml/min  
 Wavelength: 220 nm

| Time  | Module     | Command | Value |
|-------|------------|---------|-------|
| 0.01  | Pumps      | B.Conc  | 5     |
| 25.00 | Pumps      | B.Conc  | 65    |
| 25.01 | Pumps      | B.Conc  | 95    |
| 27.00 | Pumps      | B.Conc  | 95    |
| 27.01 | Pumps      | B.Conc  | 5     |
| 35.00 | Pumps      | B.Conc  | 5     |
| 35.01 | Controller | Stop    |       |

<<Column Performance>>

<Detector A>

Column : Inertsil ODS-3 4.6 x 250 mm

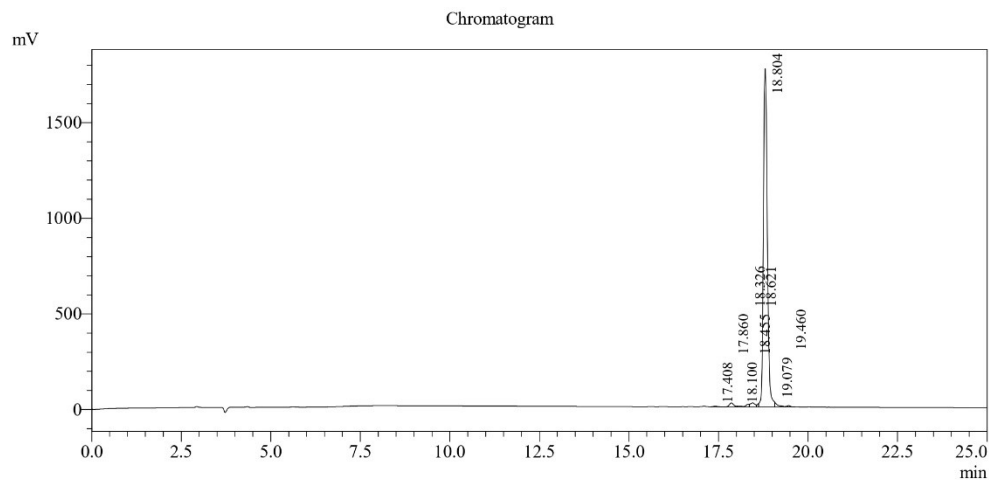

1 Detector A Channel 1 / 220nm

Peak Table

Detector A Channel 1 220nm

| Peak# | Ret. Time | Area     | Height  | Area %  |
|-------|-----------|----------|---------|---------|
| 1     | 17.408    | 21887    | 2786    | 0.154   |
| 2     | 17.860    | 163764   | 20204   | 1.149   |
| 3     | 18.100    | 22452    | 2720    | 0.157   |
| 4     | 18.326    | 78919    | 13420   | 0.554   |
| 5     | 18.455    | 186745   | 20234   | 1.310   |
| 6     | 18.621    | 50856    | 15909   | 0.357   |
| 7     | 18.804    | 13564870 | 1767740 | 95.146  |
| 8     | 19.079    | 128568   | 23068   | 0.902   |
| 9     | 19.460    | 38816    | 6156    | 0.272   |
| Total |           | 14256877 | 1872237 | 100.000 |

**Figure S4:** Analytical RP-HPLC chromatogram of N-terminal acetylated and C-terminal amidated peptide ‘b-DP1’. The chromatogram shows a single dominant peak at a retention time of ~18.80 min with an area percentage of 95.15%, indicating high purity (>95%) of the synthesized peptide. Separation was performed on an Inertsil ODS-3 (C18) column (4.6 × 250 mm) using solvent A (0.065% TFA in water) and solvent B (0.05% TFA in acetonitrile) with a gradient of 5–65% B over 25 min at a flow rate of 1.0 mL/min, monitored at 220 nm.

## MS Spectrum

Positive

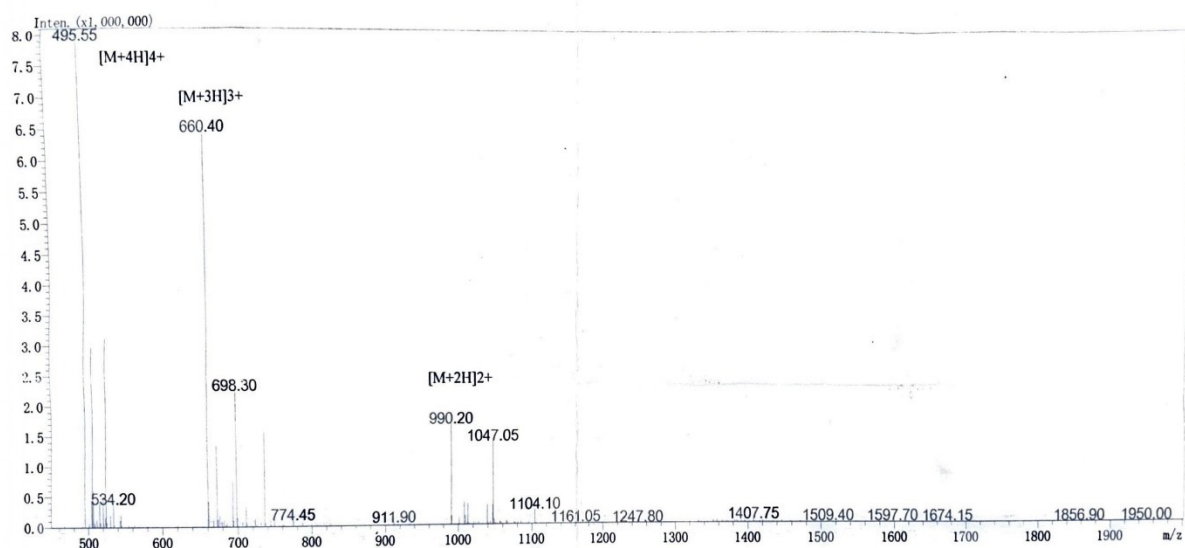

Acquired by : Huang  
Data Acquired : 2026/2/25  
Injection Volume : 1  
Sample Name : d-DP1 RK-15  
Mw : 1978.48  
Lot No. : P260213-YS1208188

Probe : ESI Probe bias : +4.5kv  
Nebulizer Gas Flow : 1.5L/min Detector : 1.2kv  
CDL : -20.0v T.Flow : 0.2ml/min  
CDL Temp : 250°C B.conc : 50%H<sub>2</sub>O/50%ACN  
Block Temp : 400°C

**Figure S5:** Electrospray ionization mass spectrum of synthetic peptide ‘D-DP1’ (all-D enantiomer). The spectrum exhibits characteristic multiply charged ion peaks corresponding to  $[M+2H]^{2+}$  and  $[M+3H]^{3+}$  species, consistent with the expected molecular weight of the peptide. The observed mass confirms successful synthesis and structural integrity of the D-amino acid analogue.

Structure :d-DP1 RK-15  
 Lot NO :P260213-YS1208188  
 Number :0200049  
 Column :4.6×250mm,ChromCore 120 C18 5u  
 Solvent A:0.1%TFA in 100%water  
 Solvent B:0.1%TFA in 100%acetonitrile  
 Gradient :
 

|         |      |      |
|---------|------|------|
|         | A    | B    |
| 0.1min  | 72%  | 28%  |
| 25.0min | 47%  | 53%  |
| 25.1min | 0%   | 100% |
| 30.0min | stop |      |

 Flow rate:1.0ml/min  
 Wavelength(nm):220  
 Volume :10ul

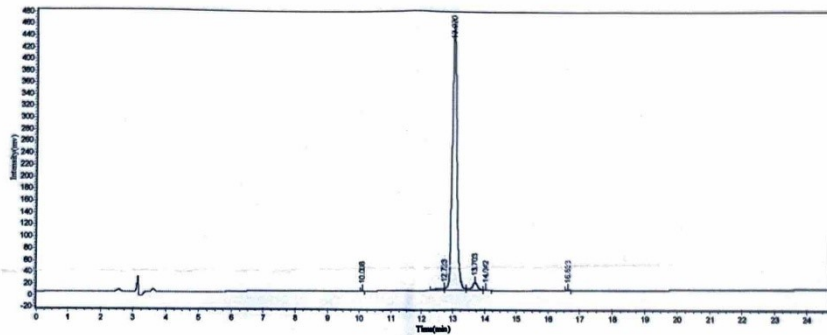

| Peak No.     | Ret Time | Height     | Area        | Conc.         |
|--------------|----------|------------|-------------|---------------|
| 1            | 10.098   | 79.231     | 374.706     | 0.0078        |
| 2            | 12.723   | 2311.313   | 40758.047   | 0.8528        |
| 3            | 13.020   | 449590.500 | 4550510.500 | 95.2117       |
| 4            | 13.703   | 13360.843  | 170957.141  | 3.5770        |
| 5            | 14.042   | 1087.677   | 11713.761   | 0.2451        |
| 6            | 16.633   | 792.828    | 5046.391    | 0.1056        |
| <b>Total</b> |          |            |             | <b>100.00</b> |

**Figure S4:** Analytical RP-HPLC chromatogram of synthetic peptide ‘D-DP1’ showing a single dominant peak, confirming a purity of >95%. Chromatographic separation was performed under conditions identical to those used for DP1, employing a ChromCore 120 C18 column with a gradient of 5–100% acetonitrile (0.1% TFA) over 25 min at a flow rate of 1.0 mL/min and detection at 220 nm.

All characterization data collectively confirm that the synthesized peptides possess high purity (>95%) and correct molecular mass, ensuring that the observed biological activities are attributable solely to the peptides.

**Table S1.** Comparative resistance development profiles of the peptides with clinically relevant antibiotics against MRSA and *Pseudomonas aeruginosa* under serial passaging conditions. Data for antibiotics are compiled from published peer-reviewed studies employing *in vitro* serial passaging and the peptide data are from the present study.

| S. No. | Antibacterial agent | Class & mechanism of action                                        | Target pathogen                           | Passaging duration                                                   | Reported fold-MIC increase                      | Primary resistance mechanism                                                | Reference |
|--------|---------------------|--------------------------------------------------------------------|-------------------------------------------|----------------------------------------------------------------------|-------------------------------------------------|-----------------------------------------------------------------------------|-----------|
| 1      | Ciprofloxacin       | Fluoroquinolone; DNA gyrase & topoisomerase IV inhibition          | MRSA                                      | <i>In vitro</i> pharmacodynamic simulation (5 days, clinical dosing) | 8–32×                                           | grlA and gyrA point mutations; NorA efflux upregulation                     | 1         |
| 2      | Ofloxacin           | Fluoroquinolone; DNA gyrase inhibition                             | <i>S. aureus</i> ATCC 29213               | ~25 days serial passage (sub-MIC)                                    | >256× (maximum tested)                          | gyrA / grlA mutations                                                       | 2         |
| 3      | Levofloxacin        | Fluoroquinolone; DNA gyrase inhibition                             | MRSA                                      | <i>In vitro</i> pharmacodynamic modeling (low-dose regimens)         | Up to 16×                                       | grlA, gyrA, grlB sequential mutations                                       | 3         |
| 4      | Meropenem           | Carbapenem; PBP inhibition, cell-wall biosynthesis                 | <i>P. aeruginosa</i> PA14                 | 11–13 passages                                                       | Up to ~64× (from ≤0.25 to 16 µg/mL)             | oprD inactivation + mexR mutation leading to MexAB-OprM efflux upregulation | 4         |
| 5      | Gentamicin          | Aminoglycoside; 30S ribosomal subunit inhibition                   | <i>P. aeruginosa</i> (clinical evolution) | Sequential clinical isolates under therapy                           | ≥4× (clonal pair MIC escalation)                | MexXY-OprM efflux upregulation; aminoglycoside-modifying enzymes            | 5         |
| 6      | Tobramycin          | Aminoglycoside; 30S ribosomal subunit inhibition                   | <i>P. aeruginosa</i>                      | Serial <i>in vitro</i> evolution                                     | ≥8×                                             | MexXY-OprM efflux; enzymatic inactivation                                   | 6         |
| 7      | Vancomycin          | Glycopeptide; D-Ala-D-Ala binding, leading to cell-wall inhibition | MRSA                                      | Stepwise <i>in vitro</i> selection with increasing concentrations    | From 1 to ≥32 µg/mL (≥32×; VISA/VRSA phenotype) | Cell-wall thickening; accumulated mutations in walK, graR, rpoB, vraS       | 7, 8      |
| 8      | Vancomycin          | Glycopeptide; D-Ala-D-Ala binding,                                 | MRSA (clinical;                           | <i>In vivo</i> evolution during prolonged                            | 8× (From 1 to 8 µg/mL;                          | Stepwise regulatory mutations; reduced                                      | 9         |

| S. No. | Antibacterial agent              | Class & mechanism of action                           | Target pathogen                              | Passaging duration                        | Reported fold-MIC increase                                           | Primary resistance mechanism                                                         | Reference  |
|--------|----------------------------------|-------------------------------------------------------|----------------------------------------------|-------------------------------------------|----------------------------------------------------------------------|--------------------------------------------------------------------------------------|------------|
|        |                                  | leading to cell-wall inhibition                       | serial isolates from single patient)         | therapy                                   | hVISA → VISA progression)                                            | autolysis                                                                            |            |
| 9      | Colistin                         | Polymyxin; LPS / lipid A disruption                   | <i>P. aeruginosa</i> (XDR clinical isolates) | Morbidostat continuous culture            | 10× within 10 days; 100× within 20 days                              | pmrAB mutations + lpxC, pmrE, migA mutations leading to L-Ara4N lipid A modification | 10         |
| 10     | Ciprofloxacin ( <i>in vivo</i> ) | Fluoroquinolone; DNA gyrase inhibition                | MRSA (hospital clinical surveillance)        | 3–12 months of hospital ciprofloxacin use | >100× (MIC <sub>90</sub> rose from susceptible baseline to 64 µg/mL) | gyrA / grlA mutations; clonal resistance spread                                      | 11         |
| 11     | DP1                              | Synthetic AMP; membrane-disruptive                    | MRSA & <i>P. aeruginosa</i>                  | 10 serial passages (sub-MIC exposure)     | No change (1×)                                                       | None detected                                                                        | This study |
| 12     | b-DP1                            | Synthetic AMP; membrane-disruptive                    | MRSA & <i>P. aeruginosa</i>                  | 10 serial passages (sub-MIC exposure)     | No change (1×)                                                       | None detected                                                                        | This study |
| 13     | D-DP1                            | Synthetic AMP; membrane-disruptive (all-D enantiomer) | MRSA & <i>P. aeruginosa</i>                  | 10 serial passages (sub-MIC exposure)     | No change (1×)                                                       | None detected                                                                        | This study |

**Notes:** MIC, minimum inhibitory concentration; MRSA, methicillin-resistant *Staphylococcus aureus*; VISA, vancomycin-intermediate *S. aureus*; VRSA, vancomycin-resistant *S. aureus*; XDR, extensively drug-resistant; LPS, lipopolysaccharide; AMP, antimicrobial peptide; PBP, penicillin-binding protein

## References

1. J. J. Campion, P. J. McNamara and M. E. Evans, *Antimicrobial Agents and Chemotherapy*, 2004, 48, 4733–4744.

2. L. L. Ling, T. Schneider, A. J. Peoples, A. L. Spoering, I. Engels, B. P. Conlon, A. Mueller, T. F. Schäberle, D. E. Hughes, S. Epstein, M. Jones, L. Lazarides, V. A. Steadman, D. R. Cohen, C. R. Felix, K. A. Fetterman, W. P. Millett, A. G. Nitti, A. M. Zullo, C. Chen and K. Lewis, *Nature*, 2015, 517, 455–459.
3. J. J. Champion, P. Chung, P. J. McNamara, W. B. Titlow and M. E. Evans, *Antimicrobial Agents and Chemotherapy*, 2005, 49, 2189–2199.
4. J. Feng, Y. Bian, C. Xu, Z. Cheng, Y. Jin, S. Jin and W. Wu, *Microorganisms*, 2025, 13, 1672.
5. M. Riou, S. Carbonnelle, L. Avrain, N. Mesaros, J.-P. Pirnay, F. Bilocq, D. De Vos, A. Simon, D. Piérard, F. Jacobs, A. Dediste, P. M. Tulkens, F. Van Bambeke and Y. Glupczynski, *International Journal of Antimicrobial Agents*, 2010, 36, 513–522.
6. D. Hocquet, P. Nordmann, F. E. Garch, L. Cabanne and P. Plésiat, *Antimicrobial Agents and Chemotherapy*, 2006, 50, 1347–1351.
7. K. Ishii, F. Tabuchi, M. Matsuo, K. Tatsuno, T. Sato, M. Okazaki, H. Hamamoto, Y. Matsumoto, C. Kaito, T. Aoyagi, K. Hiramatsu, M. Kaku, K. Moriya and K. Sekimizu, *Scientific Reports*, 2015, 5, 17092.
8. B. P. Howden, C. R. E. McEvoy, D. L. Allen, K. Chua, W. Gao, P. F. Harrison, J. Bell, G. Coombs, V. Bennett-Wood, J. L. Porter, R. Robins-Browne, J. K. Davies, T. Seemann and T. P. Stinear, *PLOS Pathogens*, 2011, 7, e1002359.
9. K. Hiramatsu, Y. Kayayama, M. Matsuo, Y. Aiba, M. Saito, T. Hishinuma and A. Iwamoto, *Journal of Global Antimicrobial Resistance*, 2014, 2, 213–224.
10. B. Döbelmann, M. Willmann, M. Steglich, B. Bunk, U. Nübel, S. Peter and R. A. Neher, *Antimicrobial Agents and Chemotherapy*, 2017, 61, e00043–00017.
11. L. R. Peterson, J. N. Quick, B. Jensen, S. Homann, S. Johnson, J. Tenquist, C. Shanholtzer, R. A. Petzel, L. Sinn and D. N. Gerding, *Archives of Internal Medicine*, 1990, 150, 2151–2155.
